# Supplementary material
Source: HighWire-hosted journal article supplement (https://diabetes.diabetesjournals.org/content/suppl/2006/01/30/55.1.70)
Supplement: CozarOnlineAppendixTable1Pg70.pdf [file CozarOnlineAppendixTable1Pg70.pdf]

**Table 1. Primers Employed for PCR**

| Gene Name           | Gene Bank Accession no. | 5' oligonucleotide                      | 3' oligonucleotide           | Product Size | Annealing Temp (°C) | Cycles | Actin P:C ratio |
|---------------------|-------------------------|-----------------------------------------|------------------------------|--------------|---------------------|--------|-----------------|
| <b>mHGF</b>         | M29145                  | cggggtaaagacctacagg                     | cccattgcaggcatgc             | 146          | 58                  | 25     | 2:8             |
| <b>mPLI</b>         | XM_127244               | ttggagcctacattgtggtg                    | agcagttcagccaaacgagt         | 179          | 58                  | 25     | 2:8             |
| <b>c-Myc</b>        | NM_010849               | cgctggaattccatgccctcaacgtgaac<br>ttcacc | cgcatcgatgagcccggagcggcggctc | 220          | 60                  | 25     | 2:8             |
| <b>E2F1</b>         | NM_007891               | gaggctggatctggagactg                    | gagtcctccgaaagcagttg         | 444          | 58                  | 25     | -               |
| <b>E2F2</b>         | NM_177733               | tggagggtatccagctcatc                    | gccagtttctgttggcatt          | 217          | 55                  | 25     | -               |
| <b>E2F3</b>         | BC059262                | agacggaaacacacagaccc                    | ccgtgtagcagactcaca           | 785          | 55                  | 25     | -               |
| <b>E2F4</b>         | NM_148952               | ctggcactgtgactgtgct                     | agcaccaccctctctgaa           | 152          | 58                  | 25     | -               |
| <b>E2F5</b>         | NM_007892               | ctcaaagcggctgcagatac                    | ccacaactctgctggtcaa          | 234          | 58                  | 25     | -               |
| <b>E2F6</b>         | NM_033270               | ggaaaacctactgccatcaa                    | atgccatccaagacattggt         | 243          | 58                  | 25     | -               |
| <b>E2F7</b>         | NM_178609               | tgcggtacggttccttaac                     | ctgacaaaaggcttctctctg        | 181          | 55                  | 25     | -               |
| <b>cyclinD3 (1)</b> | NM_007632               | gctccaaccttctcagttgc                    | cccttaagaccccacaatca         | 233          | 55                  | 25     | 2:8             |
| <b>cyclinD3 (2)</b> | NM_007632               | cgctgctctatgtctgc                       | agatatagcatggattgtct         | 318          | 55                  | 25     | 2:8             |

**Legend.** RNA was obtained from isolated islets using RNAqueous-4PCR (Ambion, Austin, TX). Complementary DNA was obtained using Advantage RT-for PCR kit (BD Biosciences, Palo Alto, CA). PCR was performed with 1  $\mu$ L cDNA in a final volume of 25  $\mu$ L containing 1xTaq buffer (Promega, Madison, WI), 200  $\mu$ mol/L dNTPs (Promega), 0.5  $\mu$ Ci ( $\alpha$ -<sup>32</sup>P) deoxycytidine triphosphate (3,000 Ci/nmol) (Amersham Pharmacia Biotech), an actin primer pair and actin competitors (Ambion, Austin, TX) that allow actin RNA to be used as an internal control, 1.25 units of Taq DNA polymerase (Promega), and 400 nmoL of the primers shown in **Table 1**. The amplification program was: 3 min at 94°C, a number of cycles previously demonstrated to be nonsaturating on the linear amplification portion of the PCR products, corresponding annealing temperature for 1 min (**Table 1**), and 72°C for 1 min. The PCR products were separated on a 5% polyacrylamide gel in Tris-borate EDTA buffer, the gel dried and developed using X-ray film.
