# Supplementary material
Source: HighWire-hosted journal article supplement (https://diabetes.diabetesjournals.org/content/suppl/2006/01/30/55.1.70)
Supplement: CozarOnlineAppendixTable2Pg70.pdf [file CozarOnlineAppendixTable2Pg70.pdf]

**Table 2. Antisera Employed**

| <b>PROTEIN/ANTIBODY</b>     | <b>COMPANY</b>      | <b>CATALOG NUMBER</b> | <b>WB CONCENTRATION</b> |
|-----------------------------|---------------------|-----------------------|-------------------------|
| <b>Cdk2</b>                 | Santa Cruz Biotech. | sc-163                | 1:500                   |
| <b>Cdk4</b>                 | Santa Cruz Biotech. | H-303                 | 1:1000                  |
| <b>Cdk6</b>                 | Cell Signalling     | 3136                  | 1:2000                  |
| <b>Cyclin D<sub>1</sub></b> | NeoMarkers          | MS-210                | 1:500                   |
| <b>Cyclin D<sub>2</sub></b> | NeoMarkers          | MS-221                | 1:500                   |
| <b>Cyclin D<sub>3</sub></b> | Santa Cruz Biotech. | sc-453                | 1:1000                  |
| <b>Cyclin A</b>             | Sigma               | c-4710                | 1:500                   |
| <b>Cyclin E</b>             | Santa Cruz Biotech. | sc-481                | 1:200                   |
| <b>p15</b>                  | Santa Cruz Biotech. | sc-1429               | 1:500                   |
| <b>p16</b>                  | Santa Cruz Biotech. | sc-1661               | 1:1000                  |
| <b>p18</b>                  | Santa Cruz Biotech. | sc-1064               | 1:500                   |
| <b>p19</b>                  | Santa Cruz Biotech. | sc-1066               | 1:1000                  |
| <b>p21</b>                  | Santa Cruz Biotech. | sc-397                | 1:1000                  |
| <b>p27</b>                  | Cell Signalling     | 2552                  | 1:1000                  |
| <b>p57</b>                  | Santa Cruz Biotech. | sc-1039               | 1:250                   |
| <b>p53</b>                  | Biomedica           | V1003                 | 1:200                   |
| <b>Mdm2</b>                 | Calbiochem          | OP115                 | 1:100                   |
| <b>pRb</b>                  | Pharmingen          | 554136                | 1:500                   |
| <b>p107</b>                 | Santa Cruz Biotech. | sc-318                | 1:850                   |
| <b>p130</b>                 | Santa Cruz Biotech. | sc-317                | 1:400                   |
| <b>Egr-1</b>                | Santa Cruz Biotech. | sc-110                | 1:500                   |
| <b>E2F1</b>                 | Calbiochem          | NA49                  | 1:100                   |
| <b>E2F2</b>                 | Santa Cruz Biotech. | Sc-9967               | 1:250                   |
| <b>E2F4</b>                 | Santa Cruz Biotech. | Sc-1082               | 1:500                   |
| <b>E2F6</b>                 | Santa Cruz Biotech. | Sc-8366               | 1:200                   |
